# Supplementary material
Source: PubMed Central journal article supplement (PMC4000808)
Supplement: 1320538111_sapp.pdf [file 1320538111_sapp.pdf]

## **Supporting Information**

### **Staphylococcal pathogenicity island DNA packaging system involving *cos*-site packaging and phage-encoded HNH endonucleases**

Nuria Quiles-Puchalt, Nuria Carpena, Juan C. Alonso, Richard P. Novick, Alberto Marina, José R. Penadés.

|                                  |                                                             | cos site   |          |
|----------------------------------|-------------------------------------------------------------|------------|----------|
| <b>ϕIPLA35</b>                   | TATAGCCCCCTGCCCATTTGGCTTAAAATGTTTTTTTCGCCGGGTAC             | CGGCGGGGGC | CCTTC 60 |
| <b>ϕ7401PVL</b>                  | TATAGCCCCCTGCCCATTTGGCTTAAAATGTTTTTTTCGCCGGGTAC             | CGGCGGGGGC | CCTTC 60 |
| <b>SaPI<sub>bov5</sub></b>       | TATAGCCCCCTGCCCATTTGGCTTAAAATGTTTTTTTCGCCGGGTAC             | CGGCGGGGGC | CCTTC 60 |
| <b>SaPI<sub>bov4</sub></b>       | TATAGCCCCCTGCCCATTTGGCTTAAAATGTTTTTTTCGCCGGGTAC             | CGGCGGGGGC | CCTTC 60 |
| <b>ϕtp310-2</b>                  | TATAGCCCCCTGCCCATCGGCTTAAAATGTTTTTTTCGCCGGGTAC              | CGGCGGGGGC | CCTTC 60 |
| <b>SaPI<sub>NN54</sub></b>       | TATAGCCCCCTACCCATCGGCTTAAAATGTTTTTTTCGACGGGTAC              | CGGCGGGGGC | CCTTC 60 |
| <b>SaPI<sub>Ishikawa11</sub></b> | TATAGCCCCCTACCCATCGGCTTAAAATGTTTTTTTCGACGGGTAC              | CGGCGGGGGC | CCTTC 60 |
| <b>ϕ12</b>                       | TATAGCCCCCTACCCATCGGCTTAAAATGTTTTTTTCGACGGGTAC              | CGGCGGGGGC | CCTTC 60 |
|                                  | *****_*****_*****_*****_*****_*****_*****_*****_*****_***** |            |          |
| <b>ϕIPLA35</b>                   | GCTTGCAACGCGGATAAACTTTTATGAAAGGGG                           |            | 93       |
| <b>ϕ7401PVL</b>                  | GCTTGCAACGCGGATAAACTTTTATGAAAGGGG                           |            | 93       |
| <b>SaPI<sub>bov5</sub></b>       | GCTTGCAACGCGGATAAACTTTTATGAAAGGGG                           |            | 93       |
| <b>SaPI<sub>bov4</sub></b>       | GCTTGCGACGCGGATAAACTTTTATGAAAGGGG                           |            | 93       |
| <b>ϕtp310-2</b>                  | GCTTGCAACGCGGATAAACTTTTATGAAAGGGG                           |            | 93       |
| <b>SaPI<sub>NN54</sub></b>       | GCTTGCAACGCGGATAAACTTTTATGAAAGGGG                           |            | 93       |
| <b>SaPI<sub>Ishikawa11</sub></b> | GCTTGCAACGCGGATAAACTTTTATGAAAGGGG                           |            | 93       |
| <b>ϕ12</b>                       | GCTTGCAACGCGGATAAACTTTTATGAAAGGGG                           |            | 93       |
|                                  | *****_*****_*****_*****_*****_*****_*****_*****_*****_***** |            |          |

**Figure S1.** Cos alignment. The predicted SaPI and phage cos sites and their flanking sequences are aligned using ClustalW2. The cos sites are shaded in yellow.

### Gram-positive

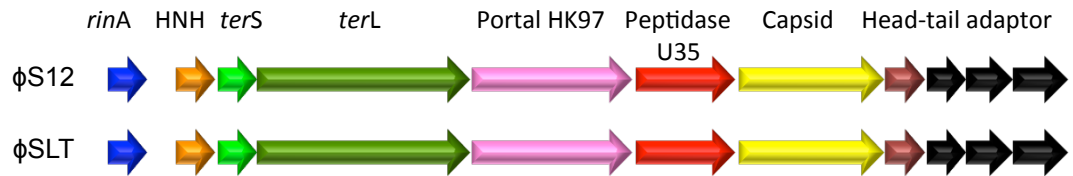

### Gram-negative

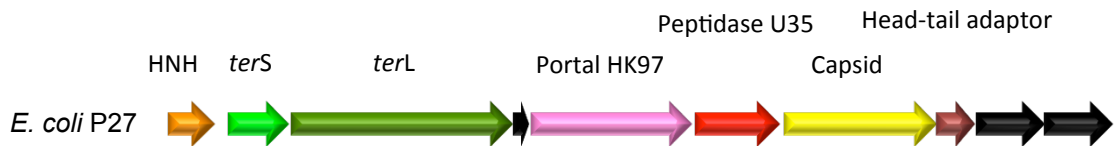

**Figure S2. Alignment of selected genes from phage genomes coding for HNH proteins.** Genes are coloured according to their sequence and function: *rinA*: blue; *hnh*: orange; *terS*: light green; *terL*: green; portal: pink; peptidase: red; capsid: yellow; head-tail adaptors: brown; hypothetical proteins: black.

*PacI* **C**GY**C**GI**S**EAG**F** QCLGV**D**R**S**DS**F**EG**Y**SP Q**N**AR**L**AC**F**IC**N**RIKSNI  
*GS15* **C**HY**C**G EIFPP EEL**T**M**D**HLVPVVRGGKST R**G**N**V**VPAC**K**EC**N**NRKKYL  
*STL* **C**Q**M**CLREDIV**T** DANIV**H**H**I**IYVDEDEFNKALDLD**N**LMSV**C**Y**S**CH**N**KI**H**AN<sup>HNH</sup>

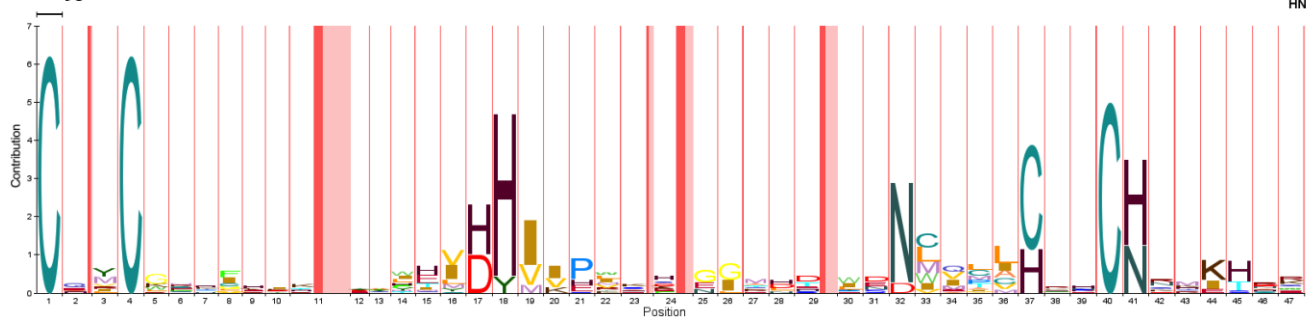

**Figure S3.** Sequence conservation in HNHs catalytic domains. HMM logo representation of PFAM family HNH (PF01844) (<http://pfam.sanger.ac.uk/family/PF01844.18>) generated by the alignment of 7400 sequences. Each position in the sequence is represented by a stack. The overall height of the stack indicates the sequence conservation at that position, while the height of symbols within the stack indicates the relative frequency of each amino at that position. The sequence corresponding to the HNH domains of  $\phi$ SLT HNH (STL), GS-15 (GS15) and *PacI* are aligned with the HMM logo and the catalytic and Zn-chelating residues displayed as stick in Fig. 3 are highlighted in red and cyan, respectively.

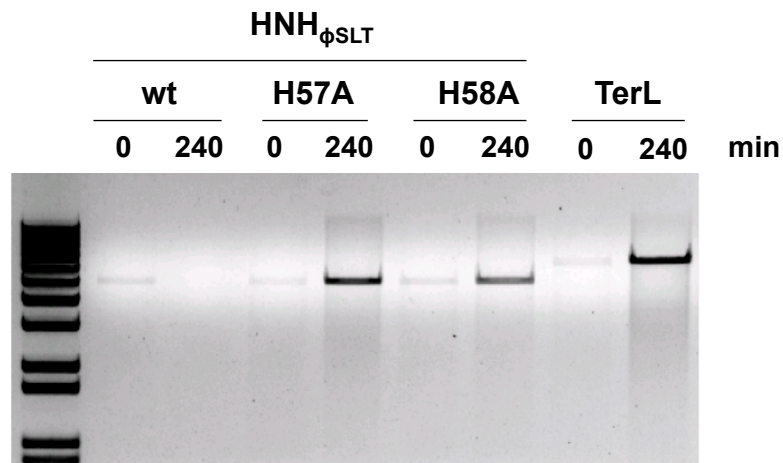

**Figure S4.** Plasmid DNA from *E. coli* strains expressing the different proteins was extracted and digested with *Bam*HI, which cuts once in the plasmid. Note that absence of plasmid in the sample obtained 240 min after IPTG induction of the wt HNH protein, which is indicative of unspecific nuclease activity. By contrast, neither the HNH mutants nor the TerL proteins showed nuclease activity.

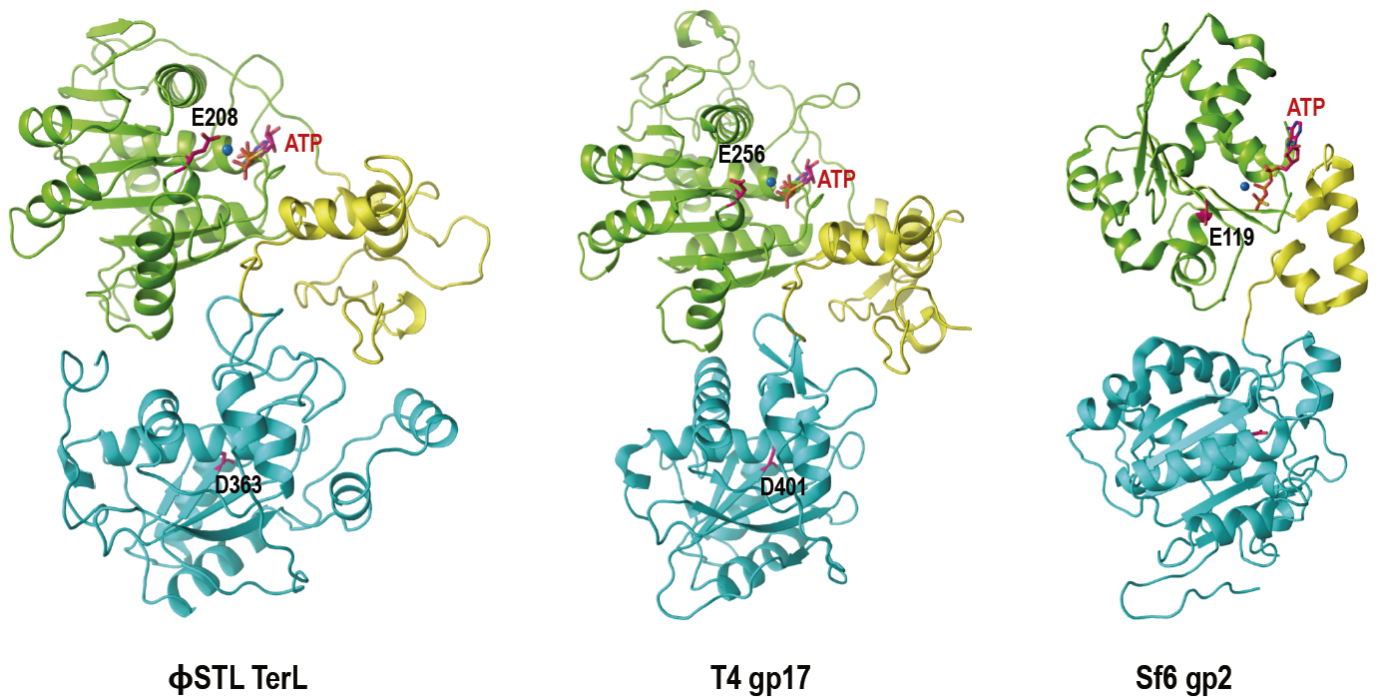

**Figure S5.** Overall modeled three-dimensional structure of TerL <sub>$\phi$ SLT</sub>. The three-dimensional structure of TerL <sub>$\phi$ SLT</sub> modeled with I-TASSER is shown in ribbon representation with the motor N-terminal domain colored in yellow (subdomain I) and green (subdomain II) and the nuclease C-terminal domain in cyan. TerL <sub>$\phi$ SLT</sub> showed an overall fold that closely resembles to phage T4 gp17 (PDB 3CPE) and distally to phage Sf6 gp2 (PDB 4IEE) large terminases, which structures are shown in ribbon representation a colored as TerL <sub>$\phi$ SLT</sub>. Catalytic residues mutated TerL <sub>$\phi$ SLT</sub> and the corresponding in T4 gp17 and Sf6 gp2 are shown in stick, labeled and colored in magenta. The ATP molecule present in the Sf6 gp2 structure was placed in TerL <sub>$\phi$ SLT</sub> and T4 gp17 structures by superimposition of the corresponding motor domains and are shown in sticks with the carbon atom in magenta.

## ATPase motif

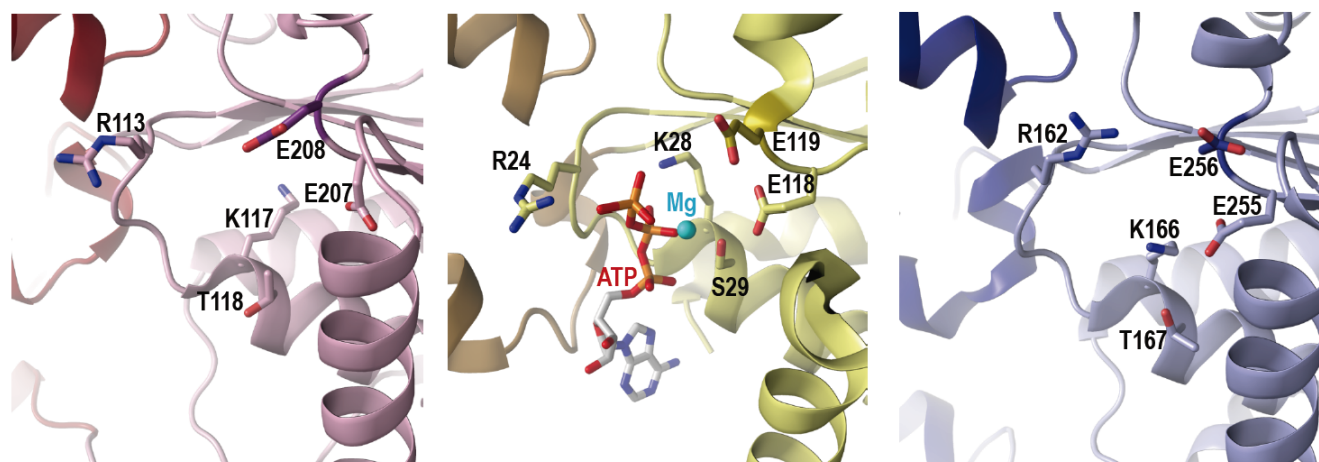

$\phi$ SLT

Sf6 gp2

T4 gp17

## Nuclease

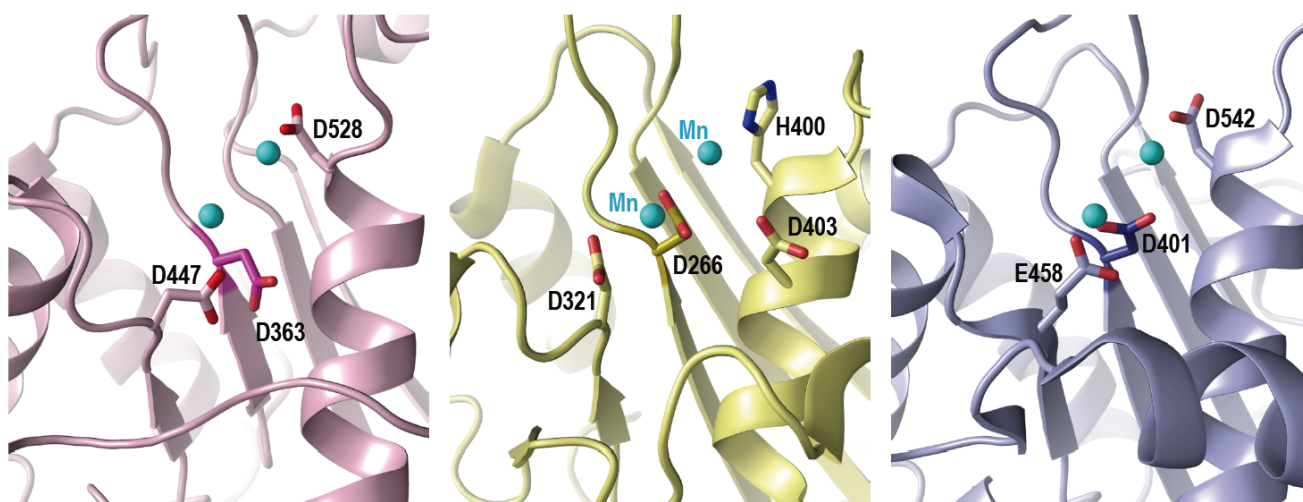

$\phi$ SLT

SPP1

T4 gp17

**Figure S6.** ATPase and nuclease active sites of TerL <sub>$\phi$ SLT</sub>. Close view of the ATPase (upper) and nuclease (lower) active sites of TerL <sub>$\phi$ SLT</sub>, Sf6 gp2 and T4 gp17 with catalytically important residues are shown as sticks. ATP molecule found in the ATPase site of Sf6 gp2 is shown in sticks with carbon atom in white. Cations found in Sf6 gp2 structure or modeled in the nuclease site of TerL <sub>$\phi$ SLT</sub> and T4 gp17 structures are shown as cyan spheres. In TerL <sub>$\phi$ SLT</sub> active site, the catalytic residues mutated in this work, Glu208 and Asp363, are highlighted in darker hues. Glu208 in the ATPase active site would correspond to the general base that polarises a water molecule for ATP nucleophilic attack. Asp363 is one of the three acidic residues forming the catalytic triad.

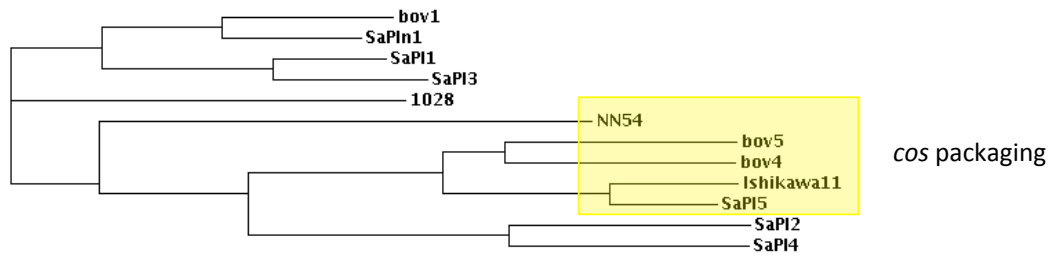

**Figure S7.** Bootstrapped Neighbor-Joining tree of different SaPIs. The tree was generated using ClustalW2 version. Shaded in yellow are the *cos*-type SaPIs.



**Table S1. Role of the different cloned *cos* sites in pCU1 transfer<sup>a</sup>.**

| Donor strain | Phage | Cloned site <i>cos</i> <sup>b</sup> | Plasmid titre <sup>c</sup> |
|--------------|-------|-------------------------------------|----------------------------|
| JP10974      | φ12   | Empty vector                        | < 10                       |
| JP10968      | φ12   | φ12                                 | 2 x 10 <sup>3</sup>        |
| JP10878      | φ12   | φ12 Δ <i>cos</i>                    | < 10                       |
| JP10907      | φ12   | φSLT                                | 6 x 10 <sup>2</sup>        |
| JP10879      | φ12   | φSLT Δ <i>cos</i>                   | < 10                       |
| JP10875      | φ12   | SaPIbov5                            | 1 x 10 <sup>3</sup>        |
| JP10876      | φ12   | SaPIbov5 Δ <i>cos</i>               | < 10                       |
| JP10908      | φ12   | φP27 <sup>d</sup>                   | < 10                       |
| JP10880      | φ12   | φP27 Δ <i>cos</i>                   | < 10                       |
| JP11204      | φ11   | Empty vector                        | 6.2 x 10 <sup>3</sup>      |
| JP11196      | φ11   | φ12                                 | 5 x 10 <sup>3</sup>        |
| JP11197      | φ11   | φ12 Δ <i>cos</i>                    | 9.6 x 10 <sup>3</sup>      |
| JP11198      | φ11   | φSLT                                | 2.4 x 10 <sup>3</sup>      |
| JP11199      | φ11   | φSLT Δ <i>cos</i>                   | 9.6 x 10 <sup>3</sup>      |
| JP11200      | φ11   | SaPIbov5                            | 3.1 x 10 <sup>3</sup>      |
| JP11201      | φ11   | SaPIbov5 Δ <i>cos</i>               | 7 x 10 <sup>3</sup>        |
| JP11202      | φ11   | φP27 <sup>d</sup>                   | 2.1 x 10 <sup>3</sup>      |
| JP11203      | φ11   | φP27 Δ <i>cos</i>                   | 1.1 x 10 <sup>3</sup>      |

<sup>a</sup>The means of results from three independent experiments are shown. Variation was within ±5% in all cases.

<sup>b</sup>In addition to the *cos* site, the cloned DNA contains ~50 pb of the flanking region to the *cos* site. The fragment cloned in the Δ*cos* plasmids are mutant in the *cos* site (maintaining the flanking sequences).

<sup>c</sup>No. of transductants/ml induced culture, using RN4220 as recipient strain.

<sup>d</sup>φP27 is an *E. coli* phage carrying a completely different *cos* site.

**Table S2. Effect of  $\phi$ SLT mutations on phage titre<sup>a</sup>.**

| $\phi$ SLT                    | Complemented <sup>b</sup>                          | Phage transductants <sup>c</sup> |
|-------------------------------|----------------------------------------------------|----------------------------------|
| Wild type                     | Empty vector                                       | $5.0 \times 10^5$                |
| $\Delta hnh$                  |                                                    | < 10                             |
| $\Delta hnh$                  | pCN51- <i>hnh</i> <sub><math>\phi</math>SLT</sub>  | $1.9 \times 10^3$                |
| HNH H57A                      |                                                    | < 10                             |
| HNH H57A                      | pCN51- <i>hnh</i> <sub><math>\phi</math>SLT</sub>  | $2.2 \times 10^2$                |
| HNH H58A                      |                                                    | < 10                             |
| HNH H58A                      | pCN51- <i>hnh</i> <sub><math>\phi</math>SLT</sub>  | $1.3 \times 10^2$                |
| $\Delta terS$                 |                                                    | < 10                             |
| $\Delta terS$                 | pCN51- <i>terS</i> <sub><math>\phi</math>SLT</sub> | $1.6 \times 10^6$                |
| $\Delta terL$                 |                                                    | < 10                             |
| $\Delta terL$                 | pCN51- <i>terL</i> <sub><math>\phi</math>SLT</sub> | $4.6 \times 10^5$                |
| TerL E208A                    |                                                    | < 10                             |
| TerL E208A                    | pCN51- <i>terL</i> <sub><math>\phi</math>SLT</sub> | $1.0 \times 10^4$                |
| TerL D363A                    |                                                    | < 10                             |
| TerL D363A                    | pCN51- <i>terL</i> <sub><math>\phi</math>SLT</sub> | $1.1 \times 10^4$                |
| $\Delta Portal$               |                                                    | < 10                             |
| $\Delta Portal$               | pCN51-p40 <sub><math>\phi</math>SLT</sub>          | $1.2 \times 10^5$                |
| $\Delta$ Prohead protease     |                                                    | < 10                             |
| $\Delta$ Prohead protease     | pCN51-p41 <sub><math>\phi</math>SLT</sub>          | $2.4 \times 10^4$                |
| $\Delta$ Major capsid protein |                                                    | < 10                             |
| $\Delta$ Major capsid protein | pCN51- p42 <sub><math>\phi</math>SLT</sub>         | $1.4 \times 10^5$                |
| Tail protein                  |                                                    | < 10                             |
| Tail protein                  | pCN51- p47 <sub><math>\phi</math>SLT</sub>         | $2.8 \times 10^5$                |

<sup>a</sup>The means of results from three independent experiments are shown. Variation was within  $\pm 5\%$  in all cases.

<sup>b</sup>Complemented in donor strain.

<sup>c</sup>No. of transductants/ml induced culture, using RN4220 as recipient strain.

**Table S3. Effect of  $\phi$ P27 mutations on phage titre<sup>a</sup>.**

| $\phi$ P27     | Mutant in        | Complemented <sup>b</sup>                           | Transductant titre <sup>c</sup> |
|----------------|------------------|-----------------------------------------------------|---------------------------------|
| Wild type      |                  | Empty vector                                        | $1.8 \times 10^8$               |
| $\Delta$ ORF34 | <i>hnh</i>       |                                                     | < 10                            |
| $\Delta$ ORF34 | <i>hnh</i>       | pBAD18- <i>hnh</i> <sub><math>\phi</math>P27</sub>  | $1.6 \times 10^7$               |
| $\Delta$ ORF35 | <i>terS</i>      |                                                     | < 10                            |
| $\Delta$ ORF35 | <i>terS</i>      | pBAD18- <i>terS</i> <sub><math>\phi</math>P27</sub> | $1.5 \times 10^5$               |
| $\Delta$ ORF36 | <i>terL</i>      |                                                     | < 10                            |
| $\Delta$ ORF36 | <i>terL</i>      | pBAD18- <i>terL</i> <sub><math>\phi</math>P27</sub> | $4.7 \times 10^6$               |
| $\Delta$ ORF38 | Portal           |                                                     | < 10                            |
| $\Delta$ ORF38 | Portal           | pBAD18-p38 <sub><math>\phi</math>P27</sub>          | $2.8 \times 10^3$               |
| $\Delta$ ORF39 | Prohead protease |                                                     | < 10                            |
| $\Delta$ ORF39 | Prohead protease | pBAD18-p39 <sub><math>\phi</math>P27</sub>          | $2.2 \times 10^5$               |
| $\Delta$ ORF40 | Major capsid     |                                                     | < 10                            |
| $\Delta$ ORF40 | Major capsid     | pBAD18-p40 <sub><math>\phi</math>P27</sub>          | $5.5 \times 10^6$               |
| $\Delta$ ORF47 | Tail protein     |                                                     | < 10                            |
| $\Delta$ ORF47 | Tail protein     | pBAD18-p47 <sub><math>\phi</math>P27</sub>          | $1.2 \times 10^6$               |

<sup>a</sup>The means of results from three independent experiments are shown. Variation was within  $\pm 5\%$  in all cases.

<sup>b</sup>Complemented in donor strain.

<sup>c</sup>No. of transductants/ml induced culture, using MG1655 as recipient strain.

**Table S4. Strains used in this study.**

| Strains | Description                                      | Reference |
|---------|--------------------------------------------------|-----------|
| RN4220  | Restriction-defective derivative of RN450        | (1)       |
| RN451   | RN450 lysogenic for $\phi$ 11                    | (2)       |
| RN10359 | RN450 lysogenic for 80 $\alpha$                  | (3)       |
| JP10435 | RN4220 lysogenic for $\phi$ 12                   | This work |
| JP1794  | RN451 SaPIbov1 <i>tst::tetM</i>                  | (4)       |
| JP7085  | RN451 SaPIbov5 <i>tetM</i>                       | This work |
| JP3603  | RN10359 SaPIbov1 <i>tst::tetM</i>                | (4)       |
| JP7084  | RN10359 SaPIbov5 <i>tetM</i>                     | This work |
| JP11041 | JP10435 SaPIbov1 <i>tst::tetM</i>                | This work |
| JP11010 | JP10435 SaPIbov5 <i>tetM</i>                     | This work |
| JP11215 | RN4220 SaPIbov5 <i>tetM</i> $\Delta$ cos site    | This work |
| JP11229 | JP10435 SaPIbov5 <i>tetM</i> $\Delta$ cos site   | This work |
| JP11228 | RN451 SaPIbov5 <i>tetM</i> $\Delta$ cos site     | This work |
| JP3377  | RN451 $\Delta$ terS                              | (4)       |
| JP3378  | JP3377 SaPIbov1 <i>tst::tetM</i>                 | (4)       |
| JP10764 | JP3377 SaPIbov5 <i>tetM</i>                      | This work |
| JP11401 | JP10764 pJP1570                                  | This work |
| JP10971 | JP10435 $\Delta$ hnh                             | This work |
| JP11011 | JP10971 SaPIbov5 <i>tetM</i>                     | This work |
| JP11406 | JP11011 pJP1514                                  | This work |
| LUG1170 | SH1000 $\phi$ SLT                                | (5)       |
| JP11195 | LUG1170 SaPIbov1 <i>tst::tetM</i>                | This work |
| JP11194 | LUG1170 SaPIbov5 <i>tetM</i>                     | This work |
| JP11230 | LUG1170 SaPIbov5 <i>tetM</i> $\Delta$ cos site   | This work |
| JP11402 | LUG1170 $\phi$ SLT $\Delta$ hnh                  | This work |
| JP11403 | JP11402 SaPIbov5 <i>tetM</i>                     | This work |
| JP11404 | JP11402 pJP1077                                  | This work |
| JP11405 | JP11403 pJP1077                                  | This work |
| JP10817 | RN4220 pJP1523                                   | This work |
| JP10818 | RN4220 pJP1524                                   | This work |
| JP6847  | RN4220 pJP836                                    | This work |
| JP6848  | RN4220 pJP837                                    | This work |
| JP5011  | RN4220 lysogenic for $\phi$ SLT <i>pvl::tetM</i> | (6)       |
| JP8240  | JP5011 $\phi$ SLT $\Delta$ hnh                   | This work |
| JP9104  | JP5011 $\phi$ SLT $\Delta$ terS                  | This work |
| JP9105  | JP5011 $\phi$ SLT $\Delta$ terL                  | This work |
| JP9106  | JP5011 $\phi$ SLT $\Delta$ ORF40                 | This work |
| JP9107  | JP5011 $\phi$ SLT $\Delta$ ORF41                 | This work |
| JP9108  | JP5011 $\phi$ SLT $\Delta$ ORF42                 | This work |
| JP9951  | JP5011 $\phi$ SLT $\Delta$ ORF47                 | This work |
| JP9666  | JP5011 $\phi$ SLT HNH H57A                       | This work |
| JP9667  | JP5011 $\phi$ SLT HNH H58A                       | This work |
| JP10934 | JP5011 $\phi$ SLT TerL E208A                     | This work |
| JP10976 | JP5011 $\phi$ SLT TerL D363A                     | This work |
| JP11367 | JP5011 pCN51                                     | This work |
| JP9059  | JP8240 pJP1077                                   | This work |
| JP9119  | JP9104 pJP1245                                   | This work |

| Strains | Description                         | Reference  |
|---------|-------------------------------------|------------|
| JP9120  | JP9105 pJP1246                      | This work  |
| JP9121  | JP9106 pJP1247                      | This work  |
| JP9122  | JP9107 pJP1248                      | This work  |
| JP9123  | JP9108 pJP1249                      | This work  |
| JP10024 | JP9951 pJP1520                      | This work  |
| JP9959  | JP9666 pJP1077                      | This work  |
| JP9960  | JP9667 pJP1077                      | This work  |
| JP11307 | JP10934 pJP1246                     | This work  |
| JP11308 | JP10976 pJP1246                     | This work  |
| JP11074 | JP10971 pJP1514                     | This work  |
| JP11204 | RN451 pCU1                          | This work  |
| JP11198 | RN451 pJP1525                       | This work  |
| JP11199 | RN451 pJP1526                       | This work  |
| JP11196 | RN451 pJP1527                       | This work  |
| JP11197 | RN451 pJP1528                       | This work  |
| JP11200 | RN451 pJP1529                       | This work  |
| JP11201 | RN451 pJP1530                       | This work  |
| JP11202 | RN451 pJP1531                       | This work  |
| JP11203 | RN451 pJP1532                       | This work  |
| JP10974 | JP10435 pCU1                        | This work  |
| JP10907 | JP10435 pJP1525                     | This work  |
| JP10879 | JP10435 pJP1526                     | This work  |
| JP10968 | JP10435 pJP1527                     | This work  |
| JP10878 | JP10435 pJP1528                     | This work  |
| JP10875 | JP10435 pJP1529                     | This work  |
| JP10876 | JP10435 pJP1530                     | This work  |
| JP10908 | JP10435 pJP1531                     | This work  |
| JP10880 | JP10435 pJP1532                     | This work  |
| JP9818  | STEC strain 2771/97 $\phi$ P27      | (7)        |
| JP10045 | JP9818 $\phi$ P27 <i>stx::tetA</i>  | This work  |
| JP10363 | <i>E. coli</i> strain MG1655        | Lab strain |
| JP10819 | JP10363 $\phi$ P27 <i>stx::tetA</i> | This work  |
| JP10960 | JP10819 $\phi$ P27 $\Delta$ ORF34   | This work  |
| JP10961 | JP10819 $\phi$ P27 $\Delta$ ORF35   | This work  |
| JP10962 | JP10819 $\phi$ P27 $\Delta$ ORF36   | This work  |
| JP10963 | JP10819 $\phi$ P27 $\Delta$ ORF38   | This work  |
| JP10964 | JP10819 $\phi$ P27 $\Delta$ ORF39   | This work  |
| JP10965 | JP10819 $\phi$ P27 $\Delta$ ORF40   | This work  |
| JP10967 | JP10819 $\phi$ P27 $\Delta$ ORF47   | This work  |
| JP11327 | JP10819 pBAD18                      | This work  |
| JP11328 | JP10960 pJP1539                     | This work  |
| JP11329 | JP10961 pJP1540                     | This work  |
| JP11330 | JP10962 pJP1541                     | This work  |

| <b>Strains</b> | <b>Description</b> | <b>Reference</b> |
|----------------|--------------------|------------------|
| JP11331        | JP10963 pJP1542    | This work        |
| JP11332        | JP10964 pJP1543    | This work        |
| JP11333        | JP10965 pJP1544    | This work        |
| JP11334        | JP10967 pJP1545    | This work        |
| JP10025        | BL21 (DE3) pJP1533 | This work        |
| JP10566        | BL21 (DE3) pJP1534 | This work        |
| JP10567        | BL21 (DE3) pJP1535 | This work        |
| JP10317        | BL21 (DE3) pJP1253 | This work        |

**Table S5. Plasmids used in this study.**

| Plasmid | Description                                                                                                              | Reference |
|---------|--------------------------------------------------------------------------------------------------------------------------|-----------|
| pMAD    | Vector for efficient allelic replacement                                                                                 | (8)       |
| pJP1510 | pMAD derivative, deletion of $\phi$ 12 <i>hnh</i>                                                                        | This work |
| pJP1076 | pMAD derivative, deletion of $\phi$ SLT ORF 37                                                                           | This work |
| pJP1240 | pMAD derivative, deletion of $\phi$ SLT ORF 38                                                                           | This work |
| pJP1241 | pMAD derivative, deletion of $\phi$ SLT ORF 39                                                                           | This work |
| pJP1242 | pMAD derivative, deletion of $\phi$ SLT ORF 40                                                                           | This work |
| pJP1243 | pMAD derivative, deletion of $\phi$ SLT ORF 41                                                                           | This work |
| pJP1244 | pMAD derivative, deletion of $\phi$ SLT ORF 42                                                                           | This work |
| pJP1509 | pMAD derivative, deletion of $\phi$ SLT ORF 47                                                                           | This work |
| pJP1254 | pMAD derivative, mutation H57A in $\phi$ SLT ORF 37                                                                      | This work |
| pJP1255 | pMAD derivative, mutation H58A in $\phi$ SLT ORF37                                                                       | This work |
| pJP1512 | pMAD derivative, mutation E208A in $\phi$ SLT ORF 39                                                                     | This work |
| pJP1513 | pMAD derivative, mutation D363A in $\phi$ SLT ORF39                                                                      | This work |
| pJP730  | pMAD derivative, insertion of the <i>tetM</i> cassette into SaPIbov5                                                     | (9)       |
| pJP1557 | pMAD derivate, deletion <i>cos</i> site SaPIbov5                                                                         | This work |
| pCN51   | Expression vector                                                                                                        | (10)      |
| pJP1514 | pCN51- <i>hnh</i> $\phi$ 12                                                                                              | This work |
| pJP1077 | pCN51- <i>hnh</i> $\phi$ SLT                                                                                             | This work |
| pJP1245 | pCN51- <i>terS</i> $\phi$ SLT                                                                                            | This work |
| pJP1246 | pCN51- <i>terL</i> $\phi$ SLT                                                                                            | This work |
| pJP1247 | pCN51-p40 $\phi$ SLT                                                                                                     | This work |
| pJP1248 | pCN51-p41 $\phi$ SLT                                                                                                     | This work |
| pJP1249 | pCN51-p42 $\phi$ SLT                                                                                                     | This work |
| pJP1520 | pCN51-p47 $\phi$ SLT                                                                                                     | This work |
| pJP1570 | pCN51- <i>terS</i> $\phi$ 11                                                                                             | This work |
| pCN42   | Used in transcriptional fusions to the staphylococcal $\beta$ -lactamase <i>blaZ</i> . Contains the <i>Pcad</i> promoter | (10)      |
| pJP1523 | Transcriptional analysis of $\phi$ 12 <i>hnh</i> in presence of RinA, pCN42 derivate                                     | This work |
| pJP1524 | Transcriptional analysis of $\phi$ 12 <i>hnh</i> in absence of RinA, pCN42 derivate                                      | This work |
| pJP836  | Transcriptional analysis of $\phi$ SLT <i>hnh</i> in presence of RinA, pCN42 derivate                                    | This work |
| pJP837  | Transcriptional analysis of $\phi$ SLT <i>hnh</i> in absence of RinA, pCN42 derivate                                     | This work |
| pKD46   | Plasmid with Red system of lambda phage.                                                                                 | (11)      |
| pCP20   | Plasmid for cassette replacement using FRTs in <i>E. coli</i> .                                                          | (11)      |
| pBAD18  | Expression vector                                                                                                        | (12)      |
| pJP1539 | pBAD18- <i>hnh</i> $\phi$ 27                                                                                             | This work |
| pJP1540 | pBAD18- <i>terS</i> $\phi$ 27                                                                                            | This work |
| pJP1541 | pBAD18- <i>terL</i> $\phi$ 27                                                                                            | This work |
| pJP1542 | pBAD18-p38 $\phi$ 27                                                                                                     | This work |
| pJP1543 | pBAD18-p39 $\phi$ 27                                                                                                     | This work |
| pJP1544 | pBAD18-p40 $\phi$ 27                                                                                                     | This work |
| pJP1545 | pBAD18-p47 $\phi$ 27                                                                                                     | This work |
| pCU1    | Cm <sup>r</sup> . Cloning vector                                                                                         | (13)      |
| pJP1525 | pCU1 <i>cos</i> site $\phi$ SLT                                                                                          | This work |
| pJP1526 | pCU1 $\Delta$ <i>cos</i> site $\phi$ SLT                                                                                 | This work |
| pJP1527 | pCU1 <i>cos</i> site $\phi$ 12                                                                                           | This work |
| pJP1528 | pCU1 $\Delta$ <i>cos</i> site $\phi$ 12                                                                                  | This work |
| pJP1529 | pCU1 <i>cos</i> site $\phi$ SaPIbov5                                                                                     | This work |
| pJP1530 | pCU1 $\Delta$ <i>cos</i> site $\phi$ SaPIbov5                                                                            | This work |

| <b>Plasmid</b> | <b>Description</b>                                                                    | <b>Reference</b> |
|----------------|---------------------------------------------------------------------------------------|------------------|
| pJP1531        | pCU1 <i>cos</i> site $\phi$ P27                                                       | This work        |
| pJP1532        | pCU1 $\Delta$ <i>cos</i> site $\phi$ P27                                              | This work        |
| pJP1533        | Expression in <i>E. coli</i> of His-HNH $\phi$ SLT, pPROEX HTa derivative             | This work        |
| pJP1534        | Expression in <i>E. coli</i> of His-HNH H57A mutant $\phi$ SLT, pPROEX HTa derivative | This work        |
| pJP1535        | Expression in <i>E. coli</i> of His-HNH H58A mutant $\phi$ SLT, pPROEX HTa derivative | This work        |
| pJP1253        | Expression in <i>E. coli</i> of His-terL $\phi$ SLT, pPROEX HTa derivative            | This work        |



**Table S6. Primers used in this study.**

| Plasmid | Oligonucleotides | Sequence (5'-3')                              |
|---------|------------------|-----------------------------------------------|
| pJP1510 | phi12-1mB        | CGCGGATCCGCATCATACGATATTAAGCCA                |
|         | phiSLTp37-1c     | GTATTGATATGACTTACGACC                         |
|         | phiSLTp37-2m     | GGTCGTAAGTCATATCAATACCTAATGTCAGTTTGTATAGC     |
|         | phiSLTp37-3cE    | CCGGAATTCCTTCATCAAATACCCATTTACC               |
| pJP1076 | phiSLT-p36-5mB   | CGCGGATCCTTGCAGAATAAAGAACTAACG                |
|         | phiSLTp37-1c     | GTATTGATATGACTTACGACC                         |
|         | phiSLTp37-2m     | GGTCGTAAGTCATATCAATACCTAATGTCAGTTTGTATAGC     |
|         | phiSLTp37-3cE    | CCGGAATTCCTTCATCAAATACCCATTTACC               |
| pJP1240 | phiSLTp37-4mB    | CGCGGATCCTAAGTAAACGAGGCACATCGC                |
|         | phiSLTp36-10c    | TAAC TTCATATAAAGACCCCC                        |
|         | phiSLTp38-4m     | GGGGGTCTTTATATGAAGTTACAAGAAGAAGGTGGTTTTGGT    |
|         | phiSLTp38-5cE    | CCGGAATTCCAACTTATCACTGTCTGAAGC                |
| pJP1241 | phiSLTp37-4mB    | CGCGGATCCTAAGTAAACGAGGCACATCGC                |
|         | phiSLTp39-1c     | CATTTAAACTTTAATAGTCACC                        |
|         | phiSLTp39-2m     | GGTGACTATTAAGTTTTAAATGAGTGGTGAAGGAAACATAGAG   |
|         | phiSLTp39-3cE    | CCGGAATTCACATCAATCGGACTAATGCC                 |
| pJP1242 | phiSLTp40-1mB    | CGCGGATCCTTCGCTAATAACGACGAAATG                |
|         | phiSLTp40-2c     | AATTTTTCTTTATGCGTGTGAC                        |
|         | phiSLTp40-3m     | GTCACACGCATAAAGAAAAATTTTATACCCAATTGACACGCCAC  |
|         | phiSLTp40-4cE    | CCGGAATTCCTTAGGTGTTCAACCAATTC                 |
| pJP1243 | phiSLTp41-1mB    | CGCGGATCCTTTGATAATGCAGTAAGAACC                |
|         | phiSLTp41-2c     | CCTTTACTTTTTGATTTTCTTTTC                      |
|         | phiSLTp41-3m     | GAAAAGAAAATCAAAAAGTAAAGGGAAAAAATTAACGCGAATGC  |
|         | phiSLTp41-4cE    | CCGGAATTC TACTAAATCTACATCTGATCC               |
| pJP1244 | phiSLTp41-5mB    | CGCGGATCCTTATACCCAATTGACACGCCAC               |
|         | phiSLTp42-1c     | TTCATATAATGTCGGCATTTC                         |
|         | phiSLTp42-2m     | GAAATGCCGACATTATATGAAGATCAGCAACGTACATTAGAC    |
|         | phiSLTp42-3cE    | CCGGAATTC TAAAGCTCTATCACTCTTAGC               |
| pJP1509 | phiSLTp47-1mB    | CGCGGATCCTTTAAAGATACGGGTGCTAGC                |
|         | phiSLTp47-2c     | ATAAGAACC TTGCTTCTGTC                         |
|         | phiSLTp47-3m     | CAGAAGGACAAGGTTCTTATGACAGTGAAGATCATT CAGAG    |
|         | phiSLTp47-4cE    | CCGGAATTC TGCTTCGCCCATTTGTCACATC              |
| pJP1254 | phiSLT-p36-5mB   | CGCGGATCCTTGCAGAATAAAGAACTAACG                |
|         | phiSLTp37-15c    | AAAATCTTCGTCGACATAAATAATGTGTGCTACAATGTTTGCATC |
|         | phiSLTp37-14m    | GATGCAAACATTGTAGCACACATTATTTATGTCGACGAAGATTTT |
|         | phiSLTp37-3cE    | CCGGAATTCCTTCATCAAATACCCATTTACC               |
| pJP1255 | phiSLT-p36-5mB   | CGCGGATCCTTGCAGAATAAAGAACTAACG                |
|         | phiSLTp37-17c    | AAAATCTTCGTCGACATAAATAATTGCATGTACAATGTTTGCATC |
|         | phiSLTp37-16m    | GATGCAAACATTGTACATGCAATTATTTATGTCGACGAAGATTTT |
|         | phiSLTp37-3cE    | CCGGAATTCCTTCATCAAATACCCATTTACC               |

| Plasmid | Oligonucleotides | Sequence (5'-3')                                                                    |
|---------|------------------|-------------------------------------------------------------------------------------|
| pJP1512 | phiSLTp39-26mS   | ACGCGT <u>TCGAC</u> TCTATGGGTTTAACTGCAGCA                                           |
|         | phiSLTp39-23c    | GAAATCAATTTATAATCTTTGAATTCATGAATTGCATCAAAAAATCCCAT<br>ATGTGATTT                     |
|         | phiSLTp39-22m    | AAATACACATATGGGTATTTTTGATGCAATTCATGAATTCAAAGATTATA<br>AATTGATTTT                    |
|         | phiSLTp39-27cB   | CGCGGATCCCTCTTTTGCGATAACATTAC                                                       |
| pJP1513 | phiSLTp39-4mB    | CGCGGATCCCTCTATGGGTTTAACTGCAGCA                                                     |
|         | phiSLTp39-25c    | TAAAGTCTCTGTTTCTGATAATGCATAACCTATAGTACATGGTCGACC<br>TTCCAATCATCTAAGGAAAT            |
|         | phiSLTp39-24m    | ATTCCTTAGATGAGTTGGAAGGTCGACCATGTAATAGGTTATGCAT<br>TATCAGAAACAGAGGACTTTA             |
|         | phiSLTp39-5cE    | CCGGAATTCCTCTTTTGCGATAACATTAC                                                       |
| pJP1557 | SaPIbov5-45mB    | CGCGGATCCGAGGGACATATCTATACAGAG                                                      |
|         | SaPIbov5-46c     | CGCGTTGCAAGCGAAGGGTTTTTTTTTTTACCCGGCGAAAAACATTTT<br>AAGCCCATGGGCAGGGGGCTATATTTTTTAT |
|         | SaPIbov5-47m     | ATAAAAAATATAGCCCCCTGCCCATGGGCTTAAAAATGTTTTTTCGCCG<br>GGTAAAAAACCCTTCGCTTGCAACGCG    |
|         | SaPIbov5-48cE    | CCGGAATTCATCATCTCCGTCACATTAC                                                        |
| pJP1514 | phi12p28-1mB     | CGCGGATCCGGCACATCGCTATGCGGTGTG                                                      |
|         | phi12p28-2cE     | CCGGAATTCAGGGGGCTATAAAAAATAATTA                                                     |
| pJP1077 | phiSLTp37-4mB    | CGCGGATCCTAAGTAAACGAGGCACATCGC                                                      |
|         | phiSLTp36-4cE    | CCGGAATTCAAACATTTTAAGCCGATGGGC                                                      |
| pJP1245 | phiSLTp38-6mB    | CGCGGATCCGAGAGGCCAAACGCTAGC                                                         |
|         | phiSLTp38-7cE    | CCGGAATTCGTTGTTAATAGTTTTGGTGAAGG                                                    |
| pJP1246 | phiSLTp39-4mB    | CGCGGATCCCTCTATGGGTTTAACTGCAGCA                                                     |
|         | phiSLTp39-5cE    | CCGGAATTCCTCTTTTGCGATAACATTAC                                                       |
| pJP1247 | phiSLTp40-5mB    | CGCGGATCCAGTGGTGAAGGAAACATAGAG                                                      |
|         | phiSLTp40-6cE    | CCGGAATTCCTTTACTTTTTGATTTCTTTTC                                                     |
| pJP1248 | phiSLTp41-5mB    | CGCGGATCCTTATACCCAATTGACACGCCAC                                                     |
|         | phiSLTp41-6cE    | CCGGAATTCATATAATGTGGCATTTC                                                          |
| pJP1249 | phiSLTp42-4mB    | CGCGGATCCCCTAAAGAAAGTATGTCACTAG                                                     |
|         | phiSLTp42-5cE    | CCGGAATTCGCTGATTTAGCCTTAGCTG                                                        |
| pJP1520 | phiSLTp47-5mS    | ACGCGT <u>CGACC</u> AGCGCATCGAATAGGTGTG                                             |
|         | phiSLTp47-6cB    | CGCGGATCCCTGCTACTTCAACATTTTGGG                                                      |
| pJP1570 | orf29phi11-21mB  | CGCGGATCCTGGGTTGGCTGATTATAGCC                                                       |
|         | orf29phi11-22cE  | CCGGAATTCGTTAAAGTTTAATTTAACTTTTCG                                                   |
| pJP1523 | phi12p27-1mS     | ACGCGT <u>CGAC</u> GGGCACATTATTGTTTGGT                                              |
|         | phi12p27-4cB     | CGCGGATCCTCTTACGTAAACACATTGAC                                                       |

| Plasmid | Oligonucleotides    | Sequence (5'-3')                                                                |
|---------|---------------------|---------------------------------------------------------------------------------|
| pJP1524 | phi12p27-1mS        | ACGCGT <u>CGAC</u> GGGCACATTATTGTTTGGT                                          |
|         | phi12p27-2c         | AGCTCTTTCGTTGGGTAA                                                              |
|         | phi12p27-3m         | TTAACCCAACGAAAGAGCTGAACTTTGTAAAGCGGTAG                                          |
|         | phi12p27-4cB        | CGCGGATCCTCTTCACGTAACACATTTGAC                                                  |
| pJP836  | phiSLTp36-7mB       | CGCGGATCCGACATTAAGTTGCTTATAGCG                                                  |
|         | phiSLTp36-8cE       | CCGGAATTCCTCTCTTAACTTCTCCATGC                                                   |
| pJP837  | phiSLTp36-7mB       | CGCGGATCCGACATTAAGTTGCTTATAGCG                                                  |
|         | phiSLTp36-2c        | GATATCATATATTGTGTTCCC                                                           |
|         | phiSLTp36-3m        | GGAACACAATATATGATATCAACTTTGTAAAGCGGTAGCG                                        |
|         | phiSLTp36-8cE       | CCGGAATTCCTCTCTTAACTTCTCCATGC                                                   |
| pJP1539 | phiP27-HNH-15mXba1  | GCTCTAGAAAGTAACAGGCATTACAGCAGC                                                  |
|         | phiP27-HNH-16cH     | CCCAAGCTTTCACCTGATTGTTTCGCGCG                                                   |
| pJP1540 | phiP27-terS-15mXba1 | GCTCTAGAAATTTTACACCCGCGAAATT                                                    |
|         | phiP27-terS-16cH    | CCCAAGCTTTCATAGGTTTTTAAATGGATTATCGC                                             |
| pJP1541 | phiP27-terL-15mXba1 | GCTCTAGAGGGAGCGATAATCCATTTAAAA                                                  |
|         | phiP27-terL-16cH    | CCCAAGCTTTTAAAGCGAACGGATCCCGTA                                                  |
| pJP1542 | phiP27p38-5mXba1    | GCTCTAGAGCAGATATCTCGACCGTACA                                                    |
|         | phiP27p38-6cH       | CCCAAGCTTTCAGACGCTGTTTTGTCTGC                                                   |
| pJP1543 | phiP27p39-6mXba1    | GCTCTAGAGATGAACATGACCACCAGTCC                                                   |
|         | phiP27p39-5cH       | CCCAAGCTTTTAAAATTTAAGATTTTTCAGTGCATTC                                           |
| pJP1544 | phiP27p40-5mXba1    | GCTCTAGACGCACTGAATGCACTGAAAAA                                                   |
|         | phiP27p40-6cH       | CCCAAGCTTTTACGCAGCGGCTTTCTGG                                                    |
| pJP1545 | phiP27p47-5mXba1    | GCTCTAGATATTTTCGCAGTTTACAGAAGT                                                  |
|         | phiP27p47-6cH       | CCCAAGCTTTTAAACGCCTGAAAGGTGAATA                                                 |
| pJP1525 | phiSLT-45mH         | CCCAAGCTTTTTTATGCCCCCTGCC                                                       |
|         | phiSLT-46cB         | CGCGGATCCGACCCCCTTTCATGAAAAAT                                                   |
| pJP1526 | phiSLT-50mE         | CCGGAATTCCCCCCTGCCATCGGCTTAAATGTTTTTCGCCGGT<br>AAAAAAAAAACCAAACGCTAGCAACGCGGA   |
|         | phiSLT-51cB         | CGCGGATCCCCCTTTCATGAAAAATTTATCCGCGTTGCTAGCGTTG<br>GTTTTTTTTTACC CGCGGAAAAACATTT |
| pJP1527 | phi12-7mE           | CCGGAATTCGCCCCCTACCCATCGGCTTAAATGTTTTTCGACGGT<br>ACCGCGGGGGCCCTTCGCTTGCAACGCGGA |
|         | phi12-8cB           | CGCGGATCCCCCTTTCATAAAAGTTTATCCGCGTTGCAAGCGAAG<br>GCCCCGCGGTTACCGTCGAAAAACATTT   |

| Plasmid | Oligonucleotides | Sequence (5'-3')                                                                           |
|---------|------------------|--------------------------------------------------------------------------------------------|
| pJP1528 | phi12-9mE        | <u>CCGGAATTC</u> GCCCCCTACCCATCGGCTTAAATGTTTTTTCGACGGGT<br>AAAAAAAAAACCCCTTCGCTTGCAACGCGGA |
|         | phi12-10mB       | CGCGGAT <u>CCCCCCTTT</u> CATAAAAGTTTATCCGCGTTGCAAGCGAAGG<br>GTTTTTTTTTACCCTCGAAAAACATT     |
| pJP1529 | SaPIbov5-41mE    | <u>CCGGAATTC</u> GCCCCCTGCCATTGGCTTAAATGTTTTTTCGCCGGGT<br>ACCGGCGGGGGCCCTTCGCTTGCAACGCGGA  |
|         | SaPIbov5-42cB    | CGCGGAT <u>CCCCCCTTT</u> CATAAAAGTTTATCCGCGTTGCAAGCGAAGG<br>GCCCCGCCGGTACCCTCGAAAAACATT    |
| pJP1530 | SaPIbov5-43mE    | <u>CCGGAATTC</u> GCCCCCTGCCATTGGCTTAAATGTTTTTTCGCCGGGT<br>AAAAAAAAAACCCCTTCGCTTGCAACGCGGA  |
|         | SaPIbov5-44cB    | CGCGGAT <u>CCCCCCTTT</u> CATAAAAGTTTATCCGCGTTGCAAGCGAAGG<br>GTTTTTTTTTACCCTCGAAAAACATT     |
| pJP1531 | hip27-18mE       | <u>CCGGAATTC</u> AGGGGCGGGTCAAATCCCTGCAACCCTGGCTGTCCGG<br>GACCGCCCGCCCCGTCAAATTTTACACCCGCG |
|         | hip27-19cB       | CGCGGAT <u>CCAATCCT</u> GAAATTTTAAATTCGCGGGTGAAAAATTTGAC<br>GGGGCGGGCGGTCCCGGACAGCCAGGGTTG |
| pJP1532 | hip27-16mE       | <u>CCGGAATTC</u> AGGGGCGGGTCAAATCCCTGCAACCCTGGCTGTCCGG<br>GACAAAAAAAAAGTCAAATTTTACACCCGCG  |
|         | hip27-17cB       | CGCGGAT <u>CCAATCCT</u> GAAATTTTAAATTCGCGGGTGAAAAATTTGAC<br>TTTTTTTTTGTCCCGGACAGCCAGGGTTG  |
| pJP1533 | phiSLTp37-9mB    | CGCGGAT <u>CCGAT</u> GACCAAGCATAATAACATT                                                   |
|         | phiSLTp37-10cE   | <u>CCGGAATTC</u> TAAATTTTGAAGCTCTAATTTTC                                                   |
| pJP1534 | phiSLTp37-9mB    | CGCGGAT <u>CCGAT</u> GACCAAGCATAATAACATT                                                   |
|         | phiSLTp37-10cE   | <u>CCGGAATTC</u> TAAATTTTGAAGCTCTAATTTTC                                                   |
| pJP1535 | phiSLTp37-9mB    | CGCGGAT <u>CCGAT</u> GACCAAGCATAATAACATT                                                   |
|         | phiSLTp37-10cE   | <u>CCGGAATTC</u> TAAATTTTGAAGCTCTAATTTTC                                                   |
| pJP1253 | phiSLTp39-7mB    | CGCGGAT <u>CCGGT</u> GGTTTTGGTGACTATTAAG                                                   |
|         | phiSLTp39-8cE    | <u>CCGGAATTC</u> TAAACGCATTATGTCTTTAATAC                                                   |

\*Underlined is shown the sequence recognized by the restriction enzymes used.

| $\phi$ P27 Mutagenesis                           | Oligonucleotides | Sequence (5'-3')                                                                      |
|--------------------------------------------------|------------------|---------------------------------------------------------------------------------------|
| $\phi$ P27 <i>stx::tetA</i>                      | hip27-1m         | GGGTCTGGTACTGATTACCTTAGCCAAAAGGAATATATGTATATGAAG<br>TGTATATTGTTACGCTGTTAACTACTTTACTT  |
|                                                  | hip27-2c         | TGCGTCCAGAAACAAAAGACGCGCATAAATAAACCGTAGATTCTCAGT<br>TAAACTTCACCTGGTATCAAGAGGGTCATTA   |
| $\phi$ P27 <i>stx::tetA</i><br><i>hnh::clor</i>  | hip27-HNH-1m     | TTCAGTGAGGGGCTGCGATAATGCCGGTATTAAGGAGATTCCAATGC<br>CATCACGAATACCTGTGTAGGCTGGAGCTGCTTC |
|                                                  | hip27-HNH-2c     | ATTTGACCCGCCCTCCCCACAAGTGAGAATAATTATCACCTGATTTCG<br>TTCGCGCGTGTATATGAATATCCTCCTTA     |
| $\phi$ P27 <i>stx::tetA</i><br><i>terS::clor</i> | hip27-terS-5m    | CCGCGAAATTAATAATTTAGGATTTGACATGTCAGGAAATCTGTTGC<br>GCCCCGAAGAGTGTGTAGGCTGGAGCTGCTTC   |
|                                                  | hip27-terS-6c    | TTTTTTCGTGTCATAGGTTTTTAAATGGATTATCGCTCCCCTGCTTCGG<br>CGTCATAAGCCCATATGAATATCCTCCTTA   |

| <b>φP27 Mutagenesis</b>                     | <b>Oligonucleotides</b> | <b>Sequence (5'-3')</b>                                                               |
|---------------------------------------------|-------------------------|---------------------------------------------------------------------------------------|
| φP27 <i>stx::tetA</i><br><i>terL::clor</i>  | phip27-terL-6m          | CACGAAAAAATTACGTGAACGTTAACGCCGCAAATCAGTATGCACGTG<br>ACGTGGTTCGCGTGTGTAGGCTGGAGCTGCTTC |
|                                             | phip27-terL-7c          | GCGCGAGAATCAGCATGATCATAATTACCTCAGTTAAAGCGAACGGAT<br>CCCGTAGGACTCCATATGAATATCCTCCTTA   |
| φP27 <i>stx::tetA</i><br><i>orf38::clor</i> | phip27-p38-1m           | ACACGGCAGTCTGTCCGGCGGAGGTAAATAGTGTCTTTTCGGGGTTAT<br>TTCAACGAAAAATGTGTAGGCTGGAGCTGCTTC |
|                                             | phip27-p38-2c           | ACTGACGGATTTTCAGGTTACGCGGTATATCAAGACGCTGTTTTGTCTG<br>CATCTCCACTCTCCATATGAATATCCTCCTTA |
| φP27 <i>stx::tetA</i><br><i>orf39::clor</i> | phip27-p39-1m           | TGACAACGGTAAGAAAAAGGAGAGTGGAGATGCAGACAAAACAGCGT<br>CTTGATATACCGCTGTGTAGGCTGGAGCTGCTTC |
|                                             | phip27-p39-2c           | TCTTTAACATCAGCCATTATTTTCTCCTGGTTAAAATTTAAGATTTTCA<br>GTGCATTGAGCATATGAATATCCTCCTTA    |
| φP27 <i>stx::tetA</i><br><i>orf40::clor</i> | phip27-p40-1m           | TGAAAAATCTTAAATTTTAACCAGGAGAAAATAATGGCTGATGTTAAAG<br>ATGTGGAACAGTGTGTAGGCTGGAGCTGCTTC |
|                                             | phip27-p40-2c           | GCCCCGCATTACGCGGGCACAAAAAAACC GCATTACGCAGCGGCTT<br>TCTGGCGGGTTGCCATATGAATATCCTCCTTA   |
| φP27 <i>stx::tetA</i><br><i>orf47::clor</i> | phip27-p47-1m           | GAAGTGAAGCCGAGGCCGTCCGCATTAACGAGGAGATGAAGCATGG<br>CTGACAGTTTTTCATGTGTAGGCTGGAGCTGCTTC |
|                                             | phip27-p47-2c           | AAGGTAAGGAAGGAAAATCCATTCTGATACCCCATTATTAACGCCTGA<br>AAGGTGAATACCCATATGAATATCCTCCTTA   |

| <b>Southern blot</b>               | <b>Oligonucleotides</b> | <b>Sequence (5'-3')</b>        |
|------------------------------------|-------------------------|--------------------------------|
| SaPIbov1 /<br>SaPIbov5<br>probe    | SaPIbov1-112mE          | CCGGAATTCAATTGCTGAGGCAAACTTC   |
|                                    | SaPIbov1-113cB          | CGCGGATCCCTAATTCTCCACGTCTAAAGC |
| φSLT probe<br>( <i>rinA</i> )      | phiSLTp36-1mB           | CGCGGATCCATCAGAGCTGAAGTTTCATGG |
|                                    | phiSLTp36-2c            | GATATCATATATTGTGTTCCC          |
| φSLT probe<br>( <i>terS</i> )      | phiSLTp38-9mB           | CGCGGATCCGATGAAAGGGGTCTTTATATG |
|                                    | phiSLTp37-5c            | AATAAAATGTTGCCAAGGCTG          |
| φP27 probe<br>( <i>terS-terL</i> ) | phip27-terL-2c          | CGCGTTGGGATTACGGTAGAG          |
|                                    | phiP27-terS-7c          | CACTCCCCTTTGGTGT               |

## References

1. Kreiswirth BN et al. (1983) The toxic shock syndrome exotoxin structural gene is not detectably transmitted by a prophage. *Nature* 305:709–712.
2. Novick R (1967) Properties of a cryptic high-frequency transducing phage in *Staphylococcus aureus*. *Virology* 33:155–166.
3. Ubeda C, Barry P, Penadés JR, Novick RP (2007) A pathogenicity island replicon in *Staphylococcus aureus* replicates as an unstable plasmid. *Proc Natl Acad Sci USA* 104:14182–14188.
4. Tormo MA et al. (2008) *Staphylococcus aureus* pathogenicity island DNA is packaged in particles composed of phage proteins. *J Bacteriol* 190:2434–2440.
5. Labandeira-Rey M et al. (2007) *Staphylococcus aureus* Panton-Valentine leukocidin causes necrotizing pneumonia. *Science* 315:1130–1133.
6. Ferrer MD et al. (2011) RinA controls phage-mediated packaging and transfer of virulence genes in Gram-positive bacteria. *Nucleic Acids Res* 39:5866–5878.
7. Muniesa M, Recktenwald J, Bielaszewska M, Karch H, Schmidt H (2000) Characterization of a shiga toxin 2e-converting bacteriophage from an *Escherichia coli* strain of human origin. *Infect Immun* 68:4850–4855.
8. Arnaud M, Chastanet A, Débarbouillé M (2004) New vector for efficient allelic replacement in naturally nontransformable, low-GC-content, gram-positive bacteria. *Appl Environ Microbiol* 70:6887–6891.
9. Viana D et al. (2010) Adaptation of *Staphylococcus aureus* to ruminant and equine hosts involves SaPI-carried variants of von Willebrand factor-binding protein. *Mol Microbiol* 77:1583–1594.
10. Charpentier E et al. (2004) Novel cassette-based shuttle vector system for gram-positive bacteria. *Appl Environ Microbiol* 70:6076–6085.
11. Datsenko KA, Wanner BL (2000) One-step inactivation of chromosomal genes in *Escherichia coli* K-12 using PCR products. *Proc Natl Acad Sci USA* 97:6640–6645.
12. Guzman LM, Belin D, Carson MJ, Beckwith J (1995) Tight regulation, modulation, and high-level expression by vectors containing the arabinose PBAD promoter. *J Bacteriol* 177:4121–4130.
13. Augustin J et al. (1992) Genetic analysis of epidermin biosynthetic genes and epidermin-negative mutants of *Staphylococcus epidermidis*. *Eur J Biochem* 204:1149–1154.
